# Supplementary material for: Effects of acrosomal conditions of frozen-thawed spermatozoa on the results of artificial insemination in Japanese Black cattle
Source: PubMed Central journal article supplement — J Reprod Dev. 2015 Aug 21;61(6):519–24. doi: 10.1262/jrd.2015-073 (PMC4685217; doi:10.1262/jrd.2015-073), 2015-08-21
Supplement: jrd-61-519-s001.pdf [file jrd-61-519-s001.pdf]

**Supplementary Fig. 1.**

Typical examples of indirect immunofluorescence patterns of acrosomal tyrosine-phosphorylated proteins of Japanese Black bull spermatozoa.

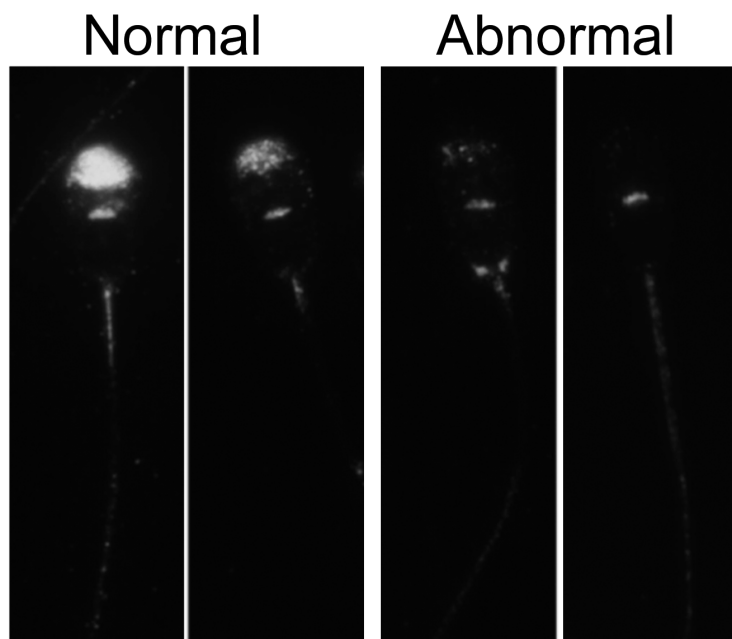

Figure S1
